# Supplementary material for: Dysprosium-based complexes with a flat pentadentate donor: a magnetic and ab initio study
Source: Royal Society of Chemistry journal article supplement (doi:10.1039/d0dt01293a), 2020-01-01
Supplement: d0dt01293a1.pdf [file d0dt01293a1.pdf]

## Supplementary material

### Dysprosium-based complexes with a flat pentadentate donor: a magnetic and *ab initio* study

Matilde Fondo,<sup>§,\*</sup> Julio Corredoira-Vázquez,<sup>§</sup> Ana M. García-Deibe,<sup>§</sup> Silvia Gómez-Coca,<sup>‡</sup> Eliseo Ruiz,<sup>‡</sup> and Jesús Sanmartín-Matalobos<sup>§</sup>

<sup>§</sup> Departamento de Química Inorgánica, Facultad de Química, Universidade de Santiago de Compostela, Campus Vida, 15782 Santiago de Compostela, Spain.

<sup>‡</sup> Departament de Química Inorgànica i Orgànica, and Institut de Química Teòrica i Computacional, Universitat de Barcelona, 08028 Barcelona, Spain

#### SCHEMES AND FIGURES

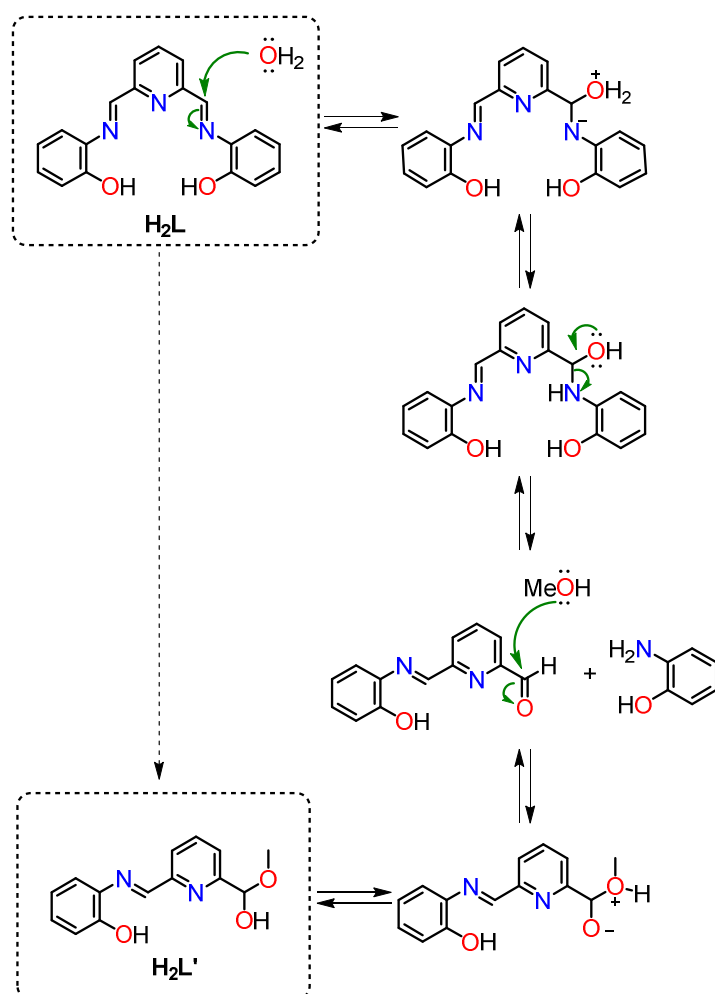

**Scheme S1.** Proposed mechanism for the formation of hemiacetal from imine functional group

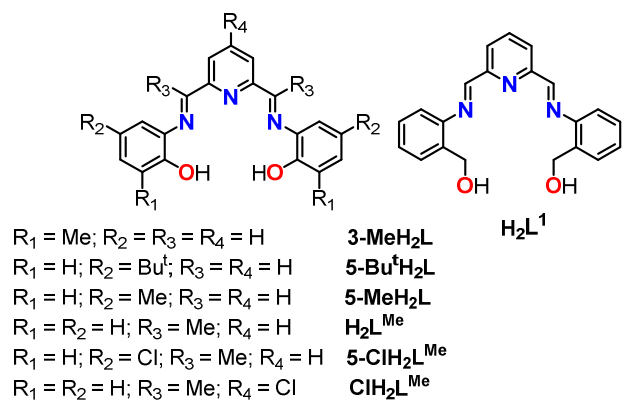

**Scheme S2.** Related ligands of H<sub>2</sub>L in crystallographically solved complexes.<sup>14-21</sup> (references in the article)

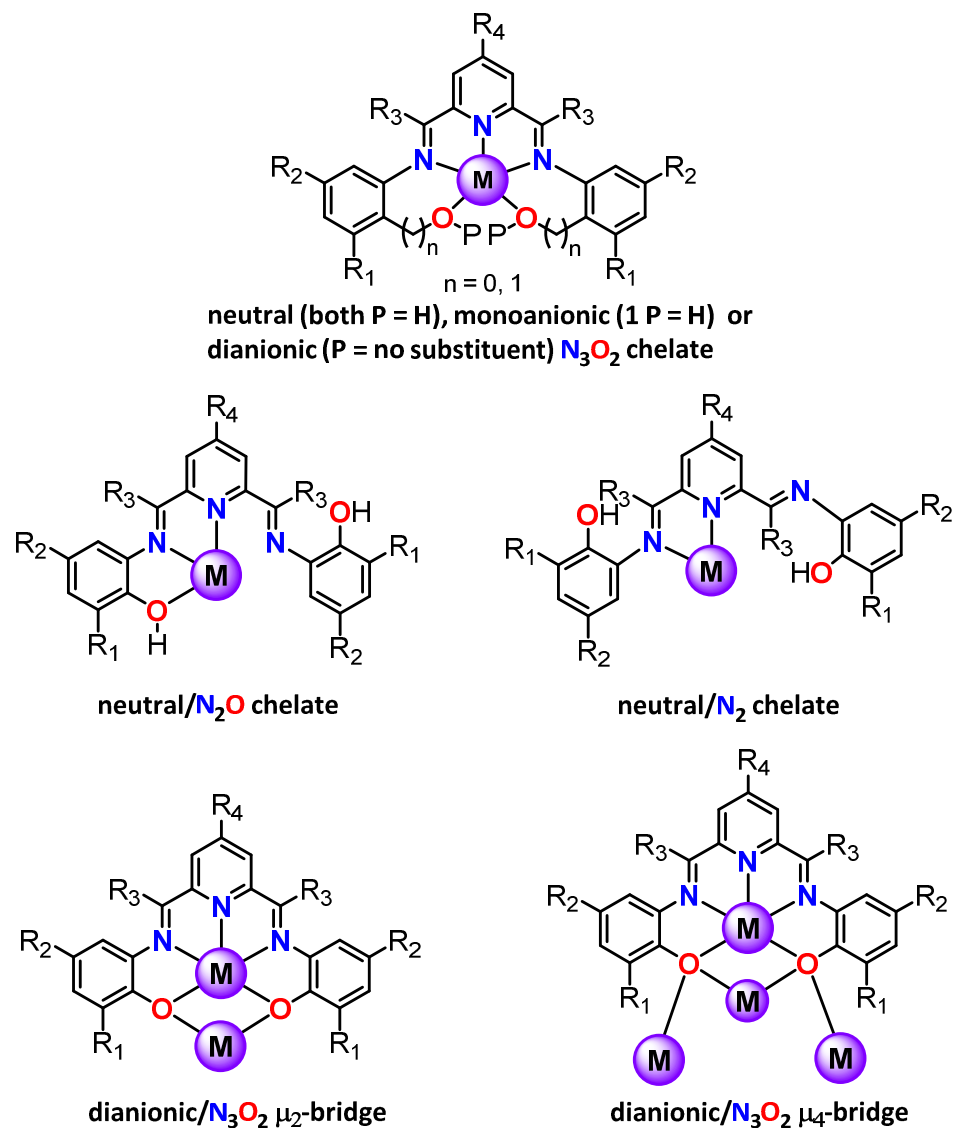

**Scheme S3.** Coordination modes shown by H<sub>2</sub>L and the ligands of Scheme S2 in metal complexes.

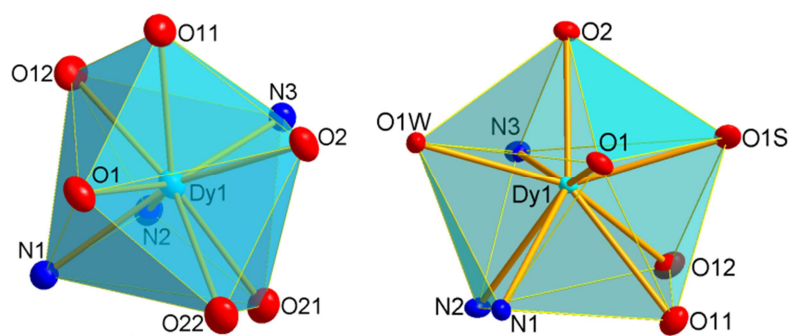

**Fig. S1.** Coordination environments for the Dy<sup>III</sup> ions in **1** (left) and **2** (right) showing the distorted spherical tricapped trigonal prism and spherical capped square antiprism structures.

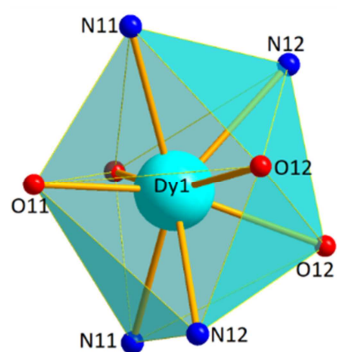

**Fig. S2.** Distorted triangular dodecahedron coordination environment for Dy<sup>III</sup> in **3a**.

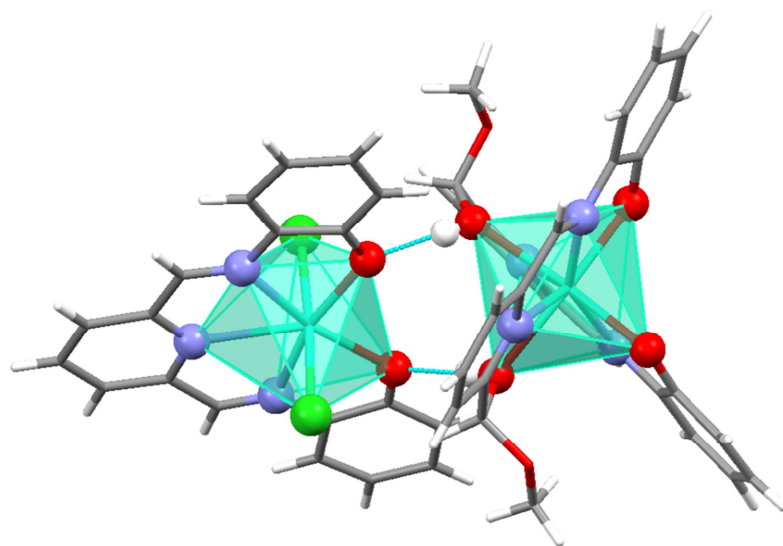

**Fig. S3.** Crystal structure of **3**, showing the hydrogen bond between **3a** and **3b**

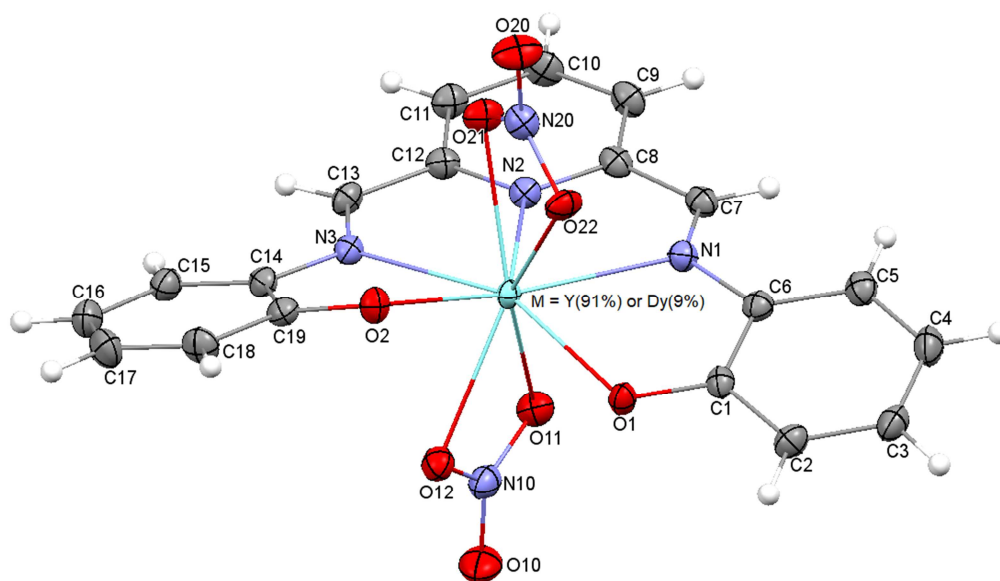

**Fig. S4.** Ellipsoid (50% probability) diagram for the anion  $[\text{Dy}_{0.09}\text{Y}_{0.91}(\text{L})(\text{NO}_3)_2]^-$  in **4**.

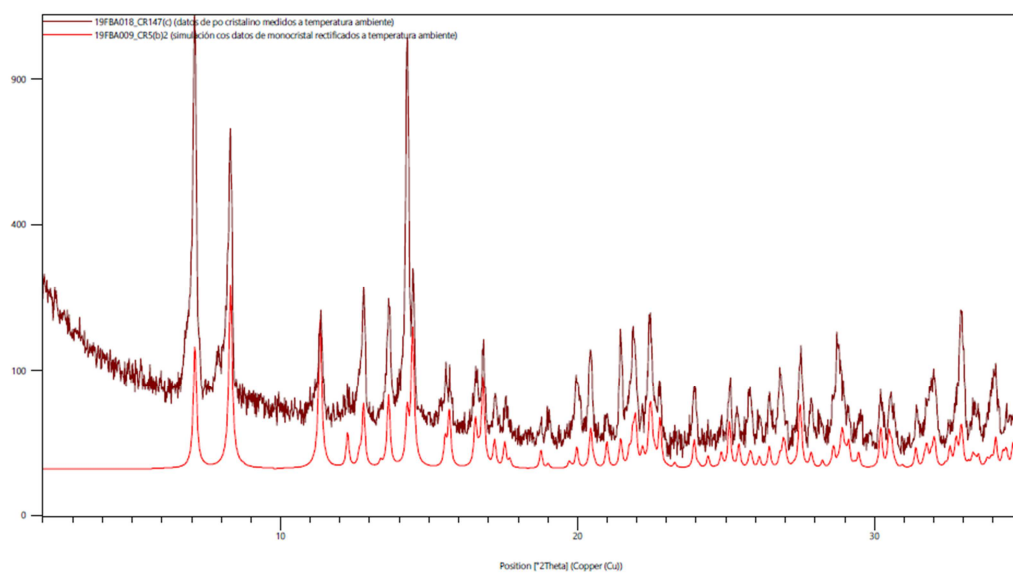

**Fig. S5.** Comparative powder X-ray diffractograms for  $2 \cdot 2\text{H}_2\text{O}$ . Garnet: experimental diffractogram for the microcrystalline sample; red: calculated diffractogram using the data obtained from single X-ray diffraction studies.

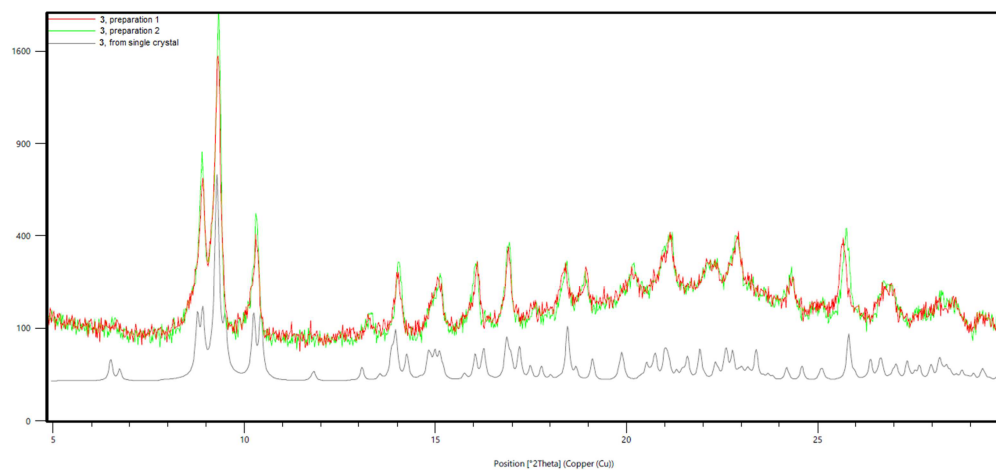

**Fig. S6.** Comparative powder X-ray diffractograms for **3**: green and red: experimental diffractograms for two microcrystalline samples obtained from two different syntheses; grey: calculated diffractogram using the data obtained from single X-ray diffraction studies.

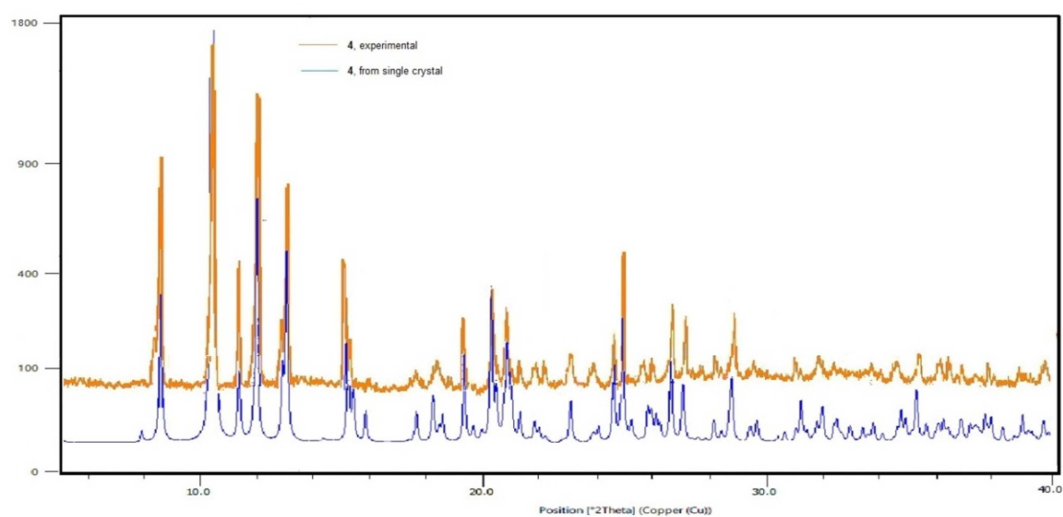

**Fig. S7.** Comparative powder X-ray diffractograms for **4**. Orange: experimental diffractogram for the microcrystalline sample; blue: calculated diffractogram using the data obtained from single X-ray diffraction studies.

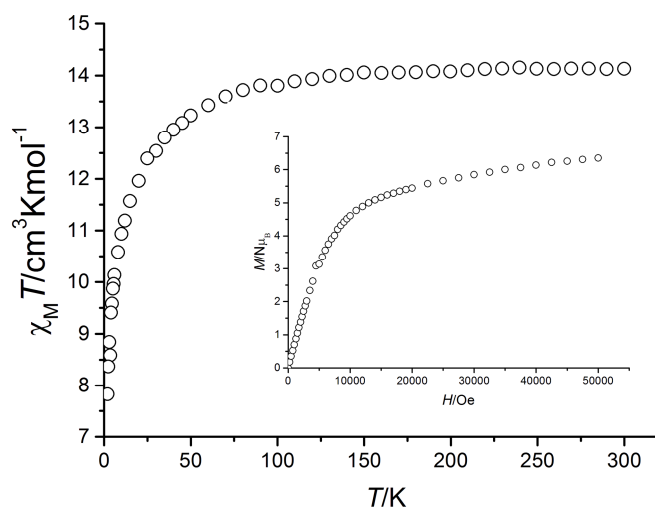

Fig. S8.  $\chi_M T$  vs  $T$  for  $2 \cdot \text{H}_2\text{O}$ . Inset:  $M/N\mu_B$  vs  $H$ .

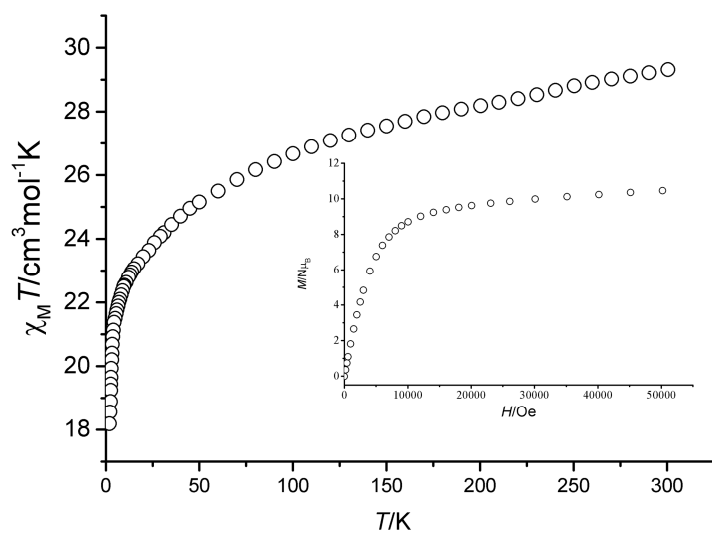

Fig. S9.  $\chi_M T$  vs  $T$  for **3**. Inset:  $M/N\mu_B$  vs  $H$ .

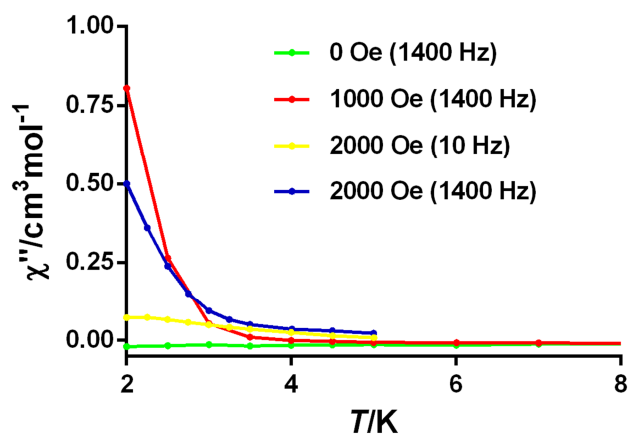

Fig. S10. Temperature, field and frequency dependence of  $\chi_M''$  for  $1 \cdot \text{H}_2\text{O}$

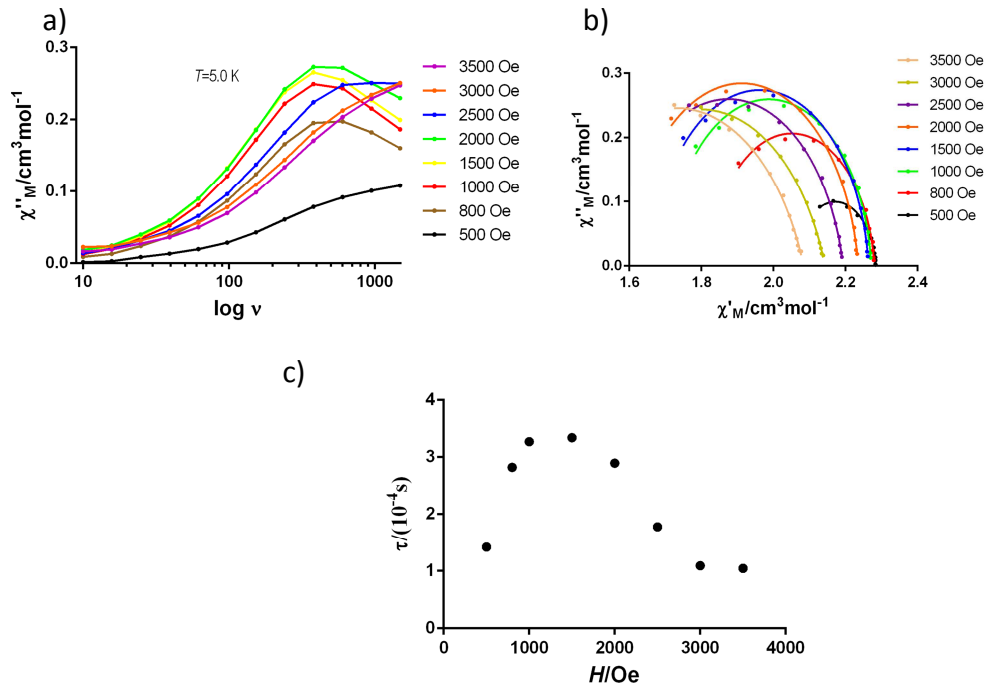

**Fig. S11.** a) Frequency dependence of  $\chi''_M$  for 2·2H<sub>2</sub>O at 5 K in various applied fields. b) Cole-Cole plot for 2·2H<sub>2</sub>O at 5 K under various applied dc fields. The solid lines represent the best fit of the experimental results with the generalized Debye model. c) Field dependence of the magnetic relaxation time at 5.0 K for 2·2H<sub>2</sub>O.

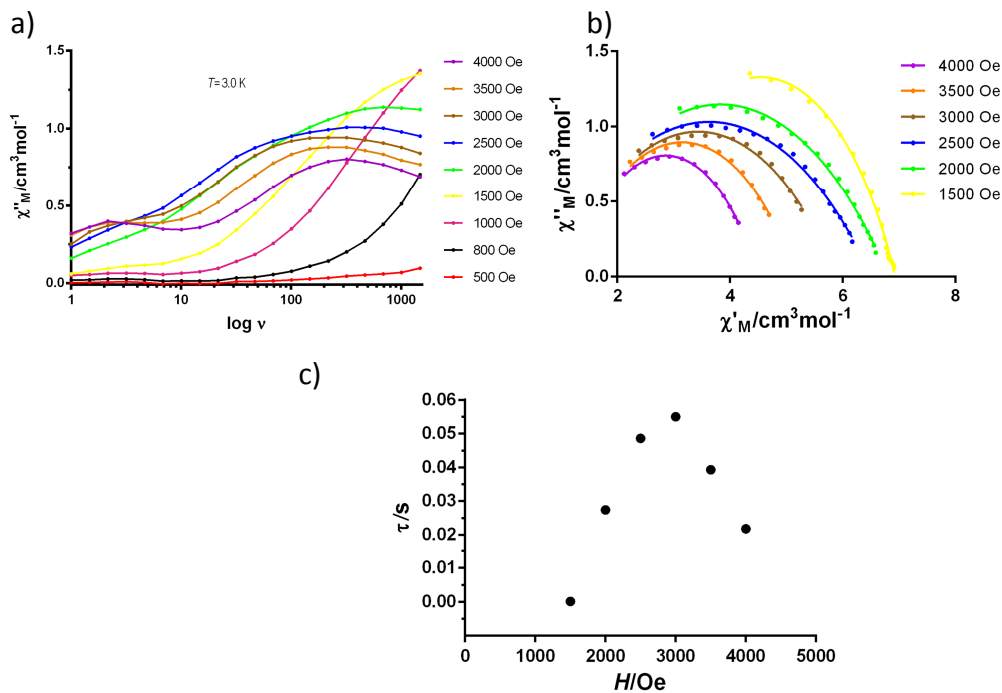

**Fig. S12.** a) Frequency dependence of  $\chi''_M$  for 3 at 3 K in various applied fields. b) Cole-Cole plot for 3 at 3 K under various applied dc fields. The solid lines represent the best fit of the experimental results with the generalized Debye model. c) Field dependence of the magnetic relaxation time at 3.0 K for 3.

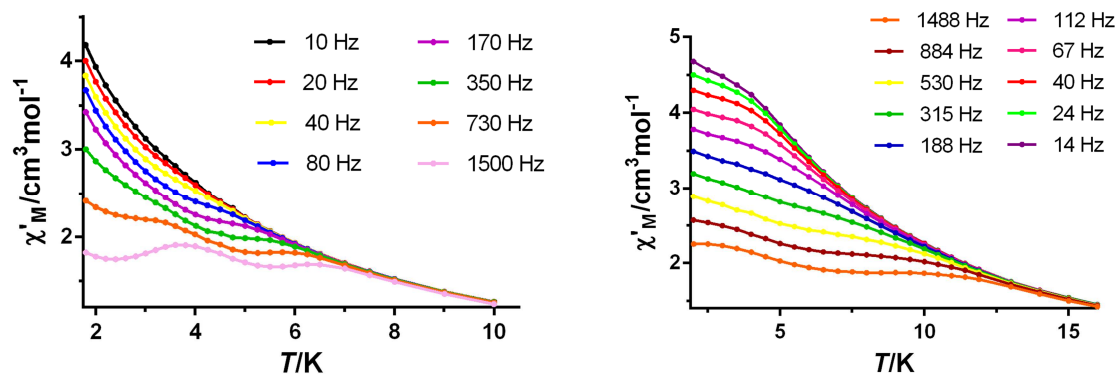

**Fig. S13.** Temperature dependence of  $\chi'_M$  for: left)  $2 \cdot 2\text{H}_2\text{O}$  in  $H_{\text{dc}} = 1500$  Oe at different frequencies; right) **3** in  $H_{\text{dc}} = 3000$  Oe at different frequencies.

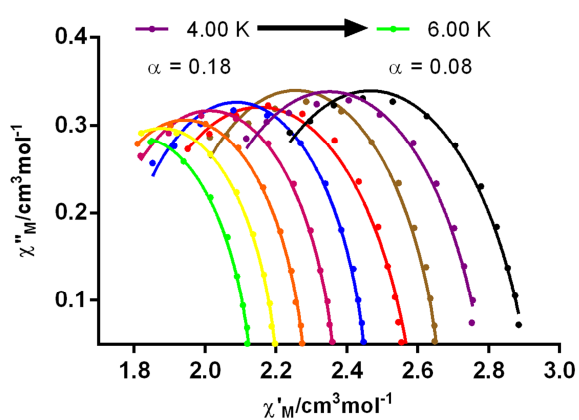

**Fig. S14.** Cole-Cole plot for  $2 \cdot 2\text{H}_2\text{O}$  in  $H_{\text{dc}} = 1500$  Oe.

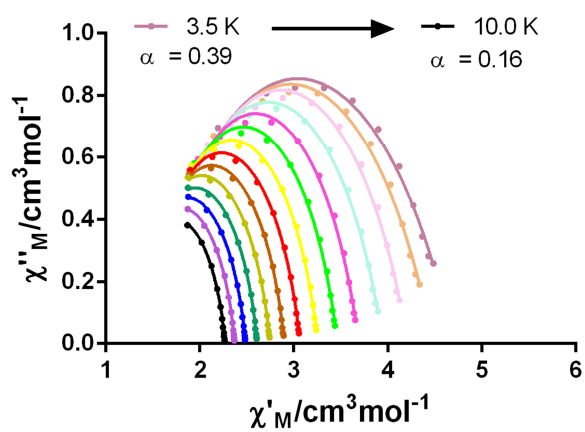

**Fig. S15.** Cole-Cole plot for **3** in  $H_{\text{dc}} = 3000$  Oe.



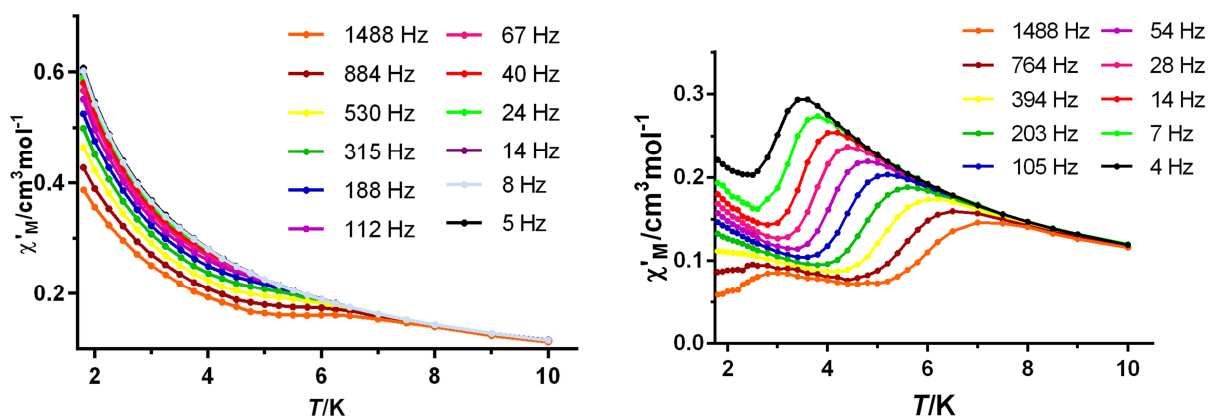

**Fig. S16.** Temperature dependence of  $\chi'_M$  for **4** at different frequencies: left) in zero dc field; right) in  $H_{dc} = 1500$  Oe.

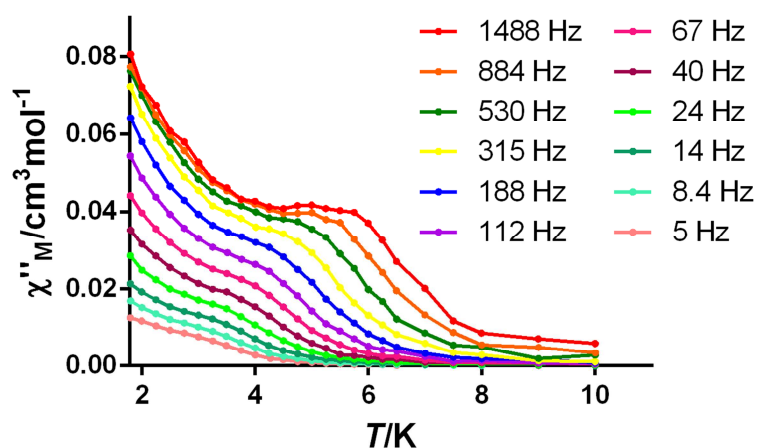

**Fig. S17.** Temperature dependence of  $\chi''_M$  for **4** in a dc zero field at different frequencies.

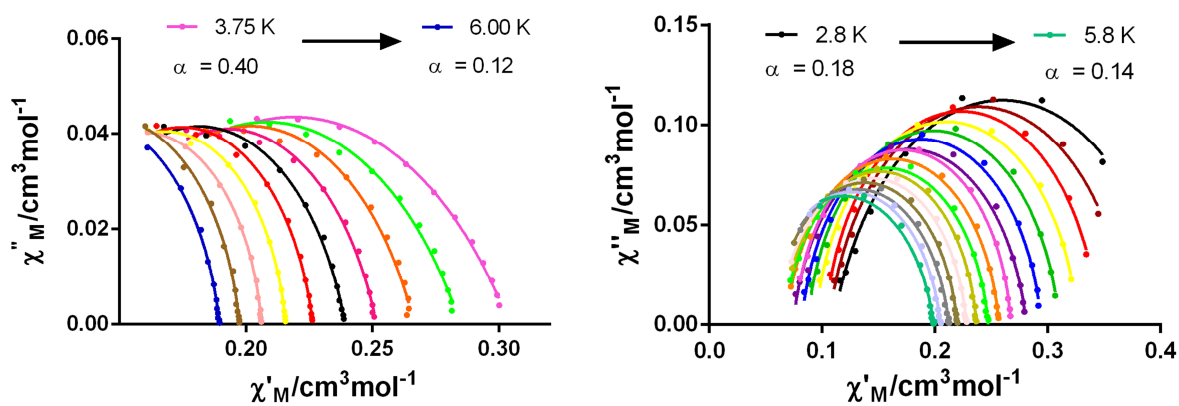

**Fig. S18.** Cole–Cole plot for **4** in: left)  $H_{dc} = 0$  Oe; right)  $H_{dc} = 1500$  Oe

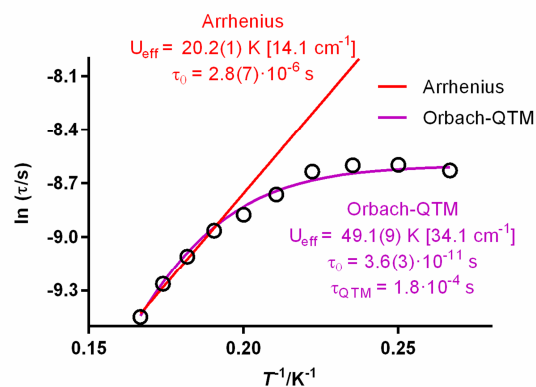

**Fig. S19.** Arrhenius plot for **4** in a zero dc applied field. The violet line accounts for the best fit considering Orbach plus QTM relaxation (eq. 1 in the article).

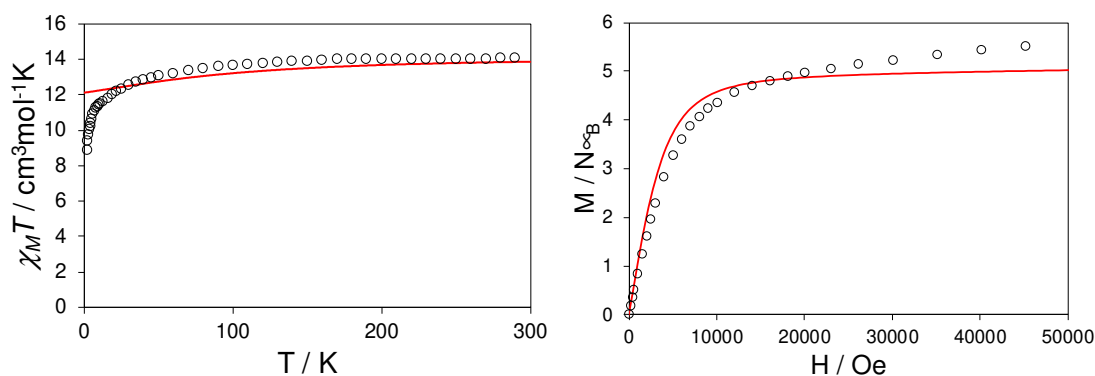

**Fig. S20.** Comparison between experimental (open circles) and calculated at CASSCF level (red lines) variable temperature dc magnetic susceptibility and magnetization curves for **1** using the model structure for the calculation without including the pyridine molecule (**1wo**).

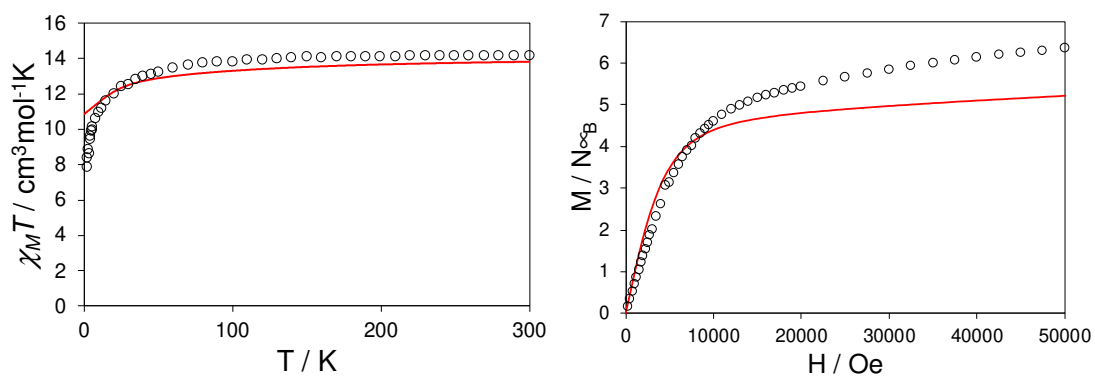

**Fig. S21.** Comparison between experimental (open circles) and calculated at CASSCF level (red lines) variable temperature dc magnetic susceptibility and magnetization curves for **2**.

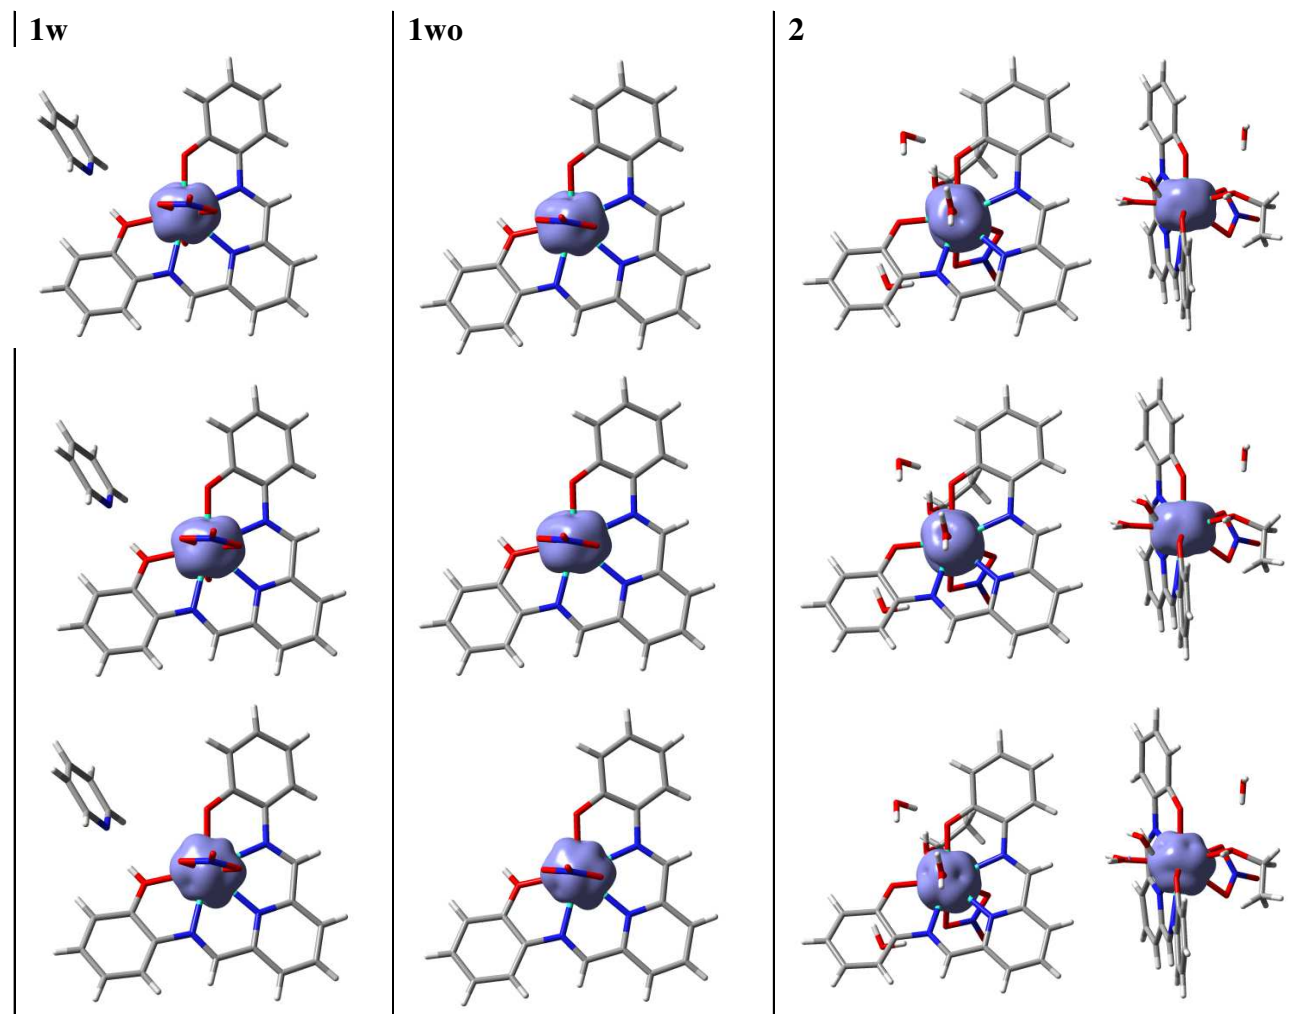

**Figure S22.** Isosurface of the CASSCF beta electron density of **1w**, **1wo** and **2** calculated as the difference between the total density and the sum of the spin density of the seven alpha active electrons for the ground (above), first excited (middle) and second excited (below) states.

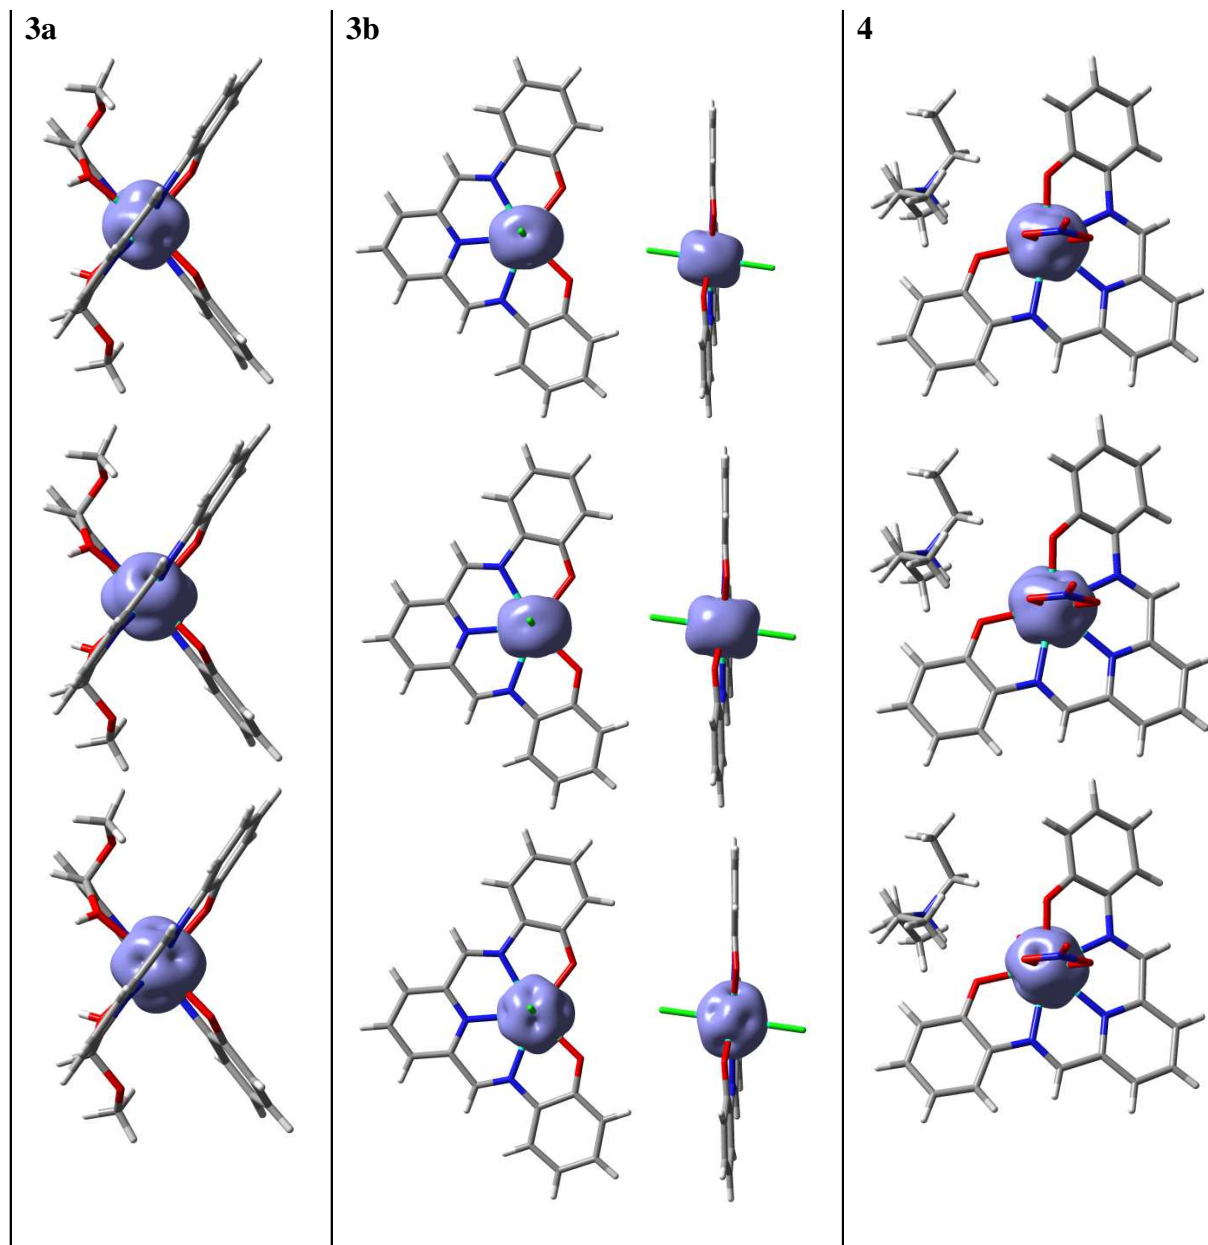

**Figure S23.** Isosurface of the CASSCF beta electron density of **3a**, **3b** and **4** calculated as the difference between the total density and the sum of the spin density of the seven alpha active electrons for the ground (above), first excited (middle) and second excited (below) states.

## TABLES

**Table S1.** Crystal data and structure refinement for  $[\text{Dy}(\text{HL})(\text{NO}_3)_2] \cdot 1.15\text{Py} \cdot 0.3\text{CH}_3\text{C}_6\text{H}_5$  (**1**·1.15Py·0.3CH<sub>3</sub>C<sub>6</sub>H<sub>5</sub>),  $[\text{Dy}(\text{L})(\text{NO}_3)(\text{H}_2\text{O})(\text{EtOH})] \cdot 2\text{H}_2\text{O}$  (**2**·2H<sub>2</sub>O),  $[\text{Dy}(\text{L}')_2][\text{Dy}(\text{L})(\text{Cl}_2)]$  (**3**) and  $\text{Et}_3\text{NH}[\text{Dy}_{0.1}\text{Y}_{0.9}(\text{L})(\text{NO}_3)_2]$  (**4**).

|                                                     | <b>1</b> ·1.15Py·0.3CH <sub>3</sub> C <sub>6</sub> H <sub>5</sub>        | <b>2</b> ·2H <sub>2</sub> O                                       | <b>3</b>                                                                                      | <b>4</b>                                                                                           |
|-----------------------------------------------------|--------------------------------------------------------------------------|-------------------------------------------------------------------|-----------------------------------------------------------------------------------------------|----------------------------------------------------------------------------------------------------|
| Formula                                             | C <sub>26.85</sub> H <sub>21.15</sub> DyN <sub>6.15</sub> O <sub>8</sub> | C <sub>21</sub> H <sub>25</sub> DyN <sub>4</sub> O <sub>9</sub>   | C <sub>47</sub> H <sub>39</sub> Cl <sub>2</sub> Dy <sub>2</sub> N <sub>7</sub> O <sub>8</sub> | C <sub>25</sub> H <sub>29</sub> Dy <sub>0.09</sub> N <sub>6</sub> O <sub>8</sub> Y <sub>0.91</sub> |
| Molecular weight                                    | 721.46                                                                   | 639.95                                                            | 1225.75                                                                                       | 637.44                                                                                             |
| Crystal system                                      | Triclinic                                                                | Monoclinic                                                        | Monoclinic                                                                                    | Monoclinic                                                                                         |
| Space group                                         | <i>P</i> -1                                                              | <i>P</i> 2 <sub>1</sub> / <i>n</i>                                | <i>C</i> 2/ <i>c</i>                                                                          | <i>P</i> 2 <sub>1</sub> / <i>n</i>                                                                 |
| Wavelength (Å)                                      | 0.71073                                                                  | 0.71073                                                           | 0.71073                                                                                       | 0.71073                                                                                            |
| Crystal size (mm <sup>3</sup> )                     | 0.180 x 0.040 x 0.020                                                    | 0.190 x 0.140 x 0.080                                             | 0.150 x 0.084 x 0.040                                                                         | 0.080 x 0.060 x 0.020                                                                              |
| Color, shape                                        | Red, plate                                                               | Red, plate                                                        | Red, plate                                                                                    | Orange, prism                                                                                      |
| <i>T</i> (K)                                        | 100(2)                                                                   | 100(2)                                                            | 100(2)                                                                                        | 100(2)                                                                                             |
| <i>a</i> (Å)                                        | 9.8073(10)                                                               | 13.9344(8)                                                        | 19.188(4)                                                                                     | 10.3588(6)                                                                                         |
| <i>b</i> (Å)                                        | 10.4055(12)                                                              | 8.2685(5)                                                         | 18.419(4)                                                                                     | 14.8159(10)                                                                                        |
| <i>c</i> (Å)                                        | 13.9823(15)                                                              | 20.4164(11)                                                       | 12.866(3)                                                                                     | 17.2043(11)                                                                                        |
| $\alpha$ (°)                                        | 86.328(4)                                                                | 90                                                                | 90                                                                                            | 90                                                                                                 |
| $\beta$ (°)                                         | 82.101(4)                                                                | 100.009(2)                                                        | 102.517(7)                                                                                    | 94.679(3)                                                                                          |
| $\gamma$ (°)                                        | 74.962(4)                                                                | 90                                                                | 90                                                                                            | 90                                                                                                 |
| Volume (Å <sup>3</sup> )                            | 1364.4(3)                                                                | 2316.5(2)                                                         | 4439.2(16)                                                                                    | 2631.6(3)                                                                                          |
| <i>Z</i>                                            | 2                                                                        | 4                                                                 | 4                                                                                             | 4                                                                                                  |
| Absor. coef. (mm <sup>-1</sup> )                    | 2.800                                                                    | 3.286                                                             | 3.525                                                                                         | 2.337                                                                                              |
| Reflections collected                               | 74232                                                                    | 179276                                                            | 13352                                                                                         | 61528                                                                                              |
| Independent reflections                             | 6798 [ <i>R</i> <sub>int</sub> = 0.0501]                                 | 7050 [ <i>R</i> <sub>int</sub> = 0.0367]                          | 6438 [ <i>R</i> <sub>int</sub> = 0.0843]                                                      | 6517 [ <i>R</i> <sub>int</sub> = 0.1012]                                                           |
| Data / restraints / param.                          | 6798 / 127 / 423                                                         | 7050 / 6 / 343                                                    | 6438 / 24 / 289                                                                               | 6517 / 0 / 369                                                                                     |
| Final <i>R</i> indices [ <i>I</i> > 2σ( <i>I</i> )] | <i>R</i> <sub>1</sub> = 0.0224<br><i>wR</i> <sub>2</sub> = 0.0462        | <i>R</i> <sub>1</sub> = 0.0216<br><i>wR</i> <sub>2</sub> = 0.0535 | <i>R</i> <sub>1</sub> = 0.0765<br><i>wR</i> <sub>2</sub> = 0.1940                             | <i>R</i> <sub>1</sub> = 0.0335<br><i>wR</i> <sub>2</sub> = 0.0602                                  |
| <i>R</i> indices (all data)                         | <i>R</i> <sub>1</sub> = 0.0277<br><i>wR</i> <sub>2</sub> = 0.0486        | <i>R</i> <sub>1</sub> = 0.0221<br><i>wR</i> <sub>2</sub> = 0.0537 | <i>R</i> <sub>1</sub> = 0.1125<br><i>wR</i> <sub>2</sub> = 0.2135                             | <i>R</i> <sub>1</sub> = 0.0581<br><i>wR</i> <sub>2</sub> = 0.0681                                  |

**Table S2.** Results of a search in CSD, for crystal structures of Dy<sup>III</sup> complexes containing ligands with neutral phenol O atoms acting as donors, also including distances for equivalent coordinate phenolate groups, when available.

| Journal and the reference                                   | C-O <sub>phenol</sub> | Dy-O <sub>phenol</sub> | C-O <sub>phenolate</sub> | Dy-O <sub>phenolate</sub> |
|-------------------------------------------------------------|-----------------------|------------------------|--------------------------|---------------------------|
| <i>Dalton Trans.</i> 10.1039/C9DT03253C                     | 1.302                 | 2.224                  |                          |                           |
| <i>RSC Advances</i> 10.1039/c6ra16669e                      | 1.299                 | 2.282                  |                          |                           |
|                                                             | 1.308                 | 2.328                  |                          |                           |
| <i>Dalton Trans.</i> 10.1039/C6DT04027F                     | 1.368                 | 2.646                  | 1.309                    | 2.143                     |
|                                                             | 1.385                 | 2.637                  | 1.322                    | 2.170                     |
| CSD Communication CCDC 809223                               | 1.357                 | 2.668                  | 1.321                    | 2.268                     |
| <i>J. Coord. Chem.</i><br>10.1080/00958972.2012.744002      | 1.275-<br>1.305       | 2.264-<br>2.295        |                          |                           |
| <i>Dalton Trans.</i> 10.1039/c2dt31023f                     | 1.279-<br>1.308       | 2.311-<br>2.357        |                          |                           |
| <i>Dalton Trans.</i> 10.1039/a606626g                       | 1.268-<br>1.295       | 2.254-<br>2.321        |                          |                           |
| <i>Inorg. Chim. Acta</i><br>10.1016/j.ica.2017.08.060       | 1.346                 | 2.266                  |                          |                           |
| <i>Inorg. Chem. Commun.</i><br>10.1016/j.inoche.2014.12.019 | 1.374-<br>1.378       | 2.400-<br>2.438        |                          |                           |
| <i>Dalton Trans.</i> 10.1039/c2dt11539e                     | 1.279                 | 2.252                  |                          |                           |
| <i>Eur. J. Inorg. Chem.</i><br>10.1002/ejic.201201336       | 1.297                 | 2.309                  |                          |                           |
| <i>Dalton Trans.</i> 10.1039/C5DT02563J                     | 1.386-<br>1.401       | 2.477-<br>2.481        |                          |                           |
| <i>This work</i>                                            | 1.354                 | 2.366                  | 1.325                    | 2.239                     |

**Table S3.** Main bond distances (Å) and angles for **1**·1.15Py·0.3CH<sub>3</sub>C<sub>6</sub>H<sub>5</sub> and **2**·2H<sub>2</sub>O.

|             | <b>1</b> ·1.15Py·0.3CH <sub>3</sub> C <sub>6</sub> H <sub>5</sub> | <b>2</b> ·2H <sub>2</sub> O |
|-------------|-------------------------------------------------------------------|-----------------------------|
| Dy1-O1      | 2.2391(16)                                                        | 2.2689(17)                  |
| Dy1-O2      | 2.3663(16)                                                        | 2.2869(17)                  |
| Dy1-N2      | 2.4872(19)                                                        | 2.503(2)                    |
| Dy1-N1      | 2.4713(19)                                                        | 2.529(2)                    |
| Dy1-N3      | 2.4971(19)                                                        | 2.538(2)                    |
| Dy1-O11     | 2.4445(17)                                                        | 2.5201(19)                  |
| Dy1-O12     | 2.4570(18)                                                        | 2.5691(19)                  |
| Dy1-O21     | 2.4576(18)                                                        |                             |
| Dy-O1W      |                                                                   | 2.3723(18)                  |
| Dy1-O22     | 2.4944(15)                                                        |                             |
| Dy-O1S      |                                                                   | 2.578(11)                   |
| O11-Dy1-O12 |                                                                   | 50.22(6)                    |
| O21-Dy1-O22 | 51.64(7)                                                          |                             |
| O1-Dy1-N3   | 158.34(6)                                                         | 160.12(6)                   |

**Table S4.** SHAPE v2.1. Continuous Shape Measures calculation (c) 2013 Electronic Structure Group, Universitat de Barcelona

**Geometries Coordination number 9**

|          |        |                                    |
|----------|--------|------------------------------------|
| MFF-9    | 13 Cs  | Muffin                             |
| HH-9     | 12 C2v | Hula-hoop                          |
| JTDIC-9  | 11 C3v | Tridiminished icosahedron J63      |
| TCTPR-9  | 10 D3h | Spherical tricapped trigonal prism |
| JTCTPR-9 | 9 D3h  | Tricapped trigonal prism J51       |
| CSAPR-9  | 8 C4v  | Spherical capped square antiprism  |
| JCSAPR-9 | 7 C4v  | Capped square antiprism J10        |
| CCU-9    | 6 C4v  | Spherical-relaxed capped cube      |
| JCCU-9   | 5 C4v  | Capped cube J8                     |
| JTC-9    | 4 C3v  | Johnson triangular cupola J3       |
| HBPY-9   | 3 D7h  | Heptagonal bipyramid               |
| OPY-9    | 2 C8v  | Octagonal pyramid                  |
| EP-9     | 1 D9h  | Enneagon                           |

**Geometries Coordination number 8**

|          |        |                                            |
|----------|--------|--------------------------------------------|
| TBPY-8   | 13 D3h | Elongated trigonal bipyramid               |
| TT-8     | 12 Td  | Triakis tetrahedron                        |
| JSD-8    | 11 D2d | Snub diphendoid J84                        |
| BTPR-8   | 10 C2v | Biaugmented trigonal prism                 |
| JBTPR-8  | 9 C2v  | Biaugmented trigonal prism J50             |
| JETBPY-8 | 8 D3h  | Johnson elongated triangular bipyramid J14 |
| JGBF-8   | 7 D2d  | Johnson gyrobifastigium J26                |
| TDD-8    | 6 D2d  | Triangular dodecahedron                    |
| SAPR-8   | 5 D4d  | Square antiprism                           |
| CU-8     | 4 Oh   | Cube                                       |
| HBPY-8   | D6h    | Hexagonal bipyramid                        |
| HPY-8    | 2 C7v  | Heptagonal pyramid                         |
| OP-8     | 1 D8h  | Octagon                                    |

**Geometries Coordination number 7**

|         |       |                                         |
|---------|-------|-----------------------------------------|
| ETPY-7  | 7 C3v | Johnson elongated triangular pyramid J7 |
| JPBPY-7 | 6 D5h | Johnson pentagonal bipyramid J13        |
| CTPR-7  | 5 C2v | Capped trigonal prism                   |
| COC-7   | 4 C3v | Capped octahedron                       |
| PBPY-7  | 3 D5h | Pentagonal bipyramid                    |
| HPY-7   | 2 C6v | Hexagonal pyramid                       |
| HP-7    | 1 D7h | Heptagon                                |

**1·1.15Py·0.3CH<sub>3</sub>C<sub>6</sub>H<sub>5</sub>**

|                 |               |        |         |                |          |         |
|-----------------|---------------|--------|---------|----------------|----------|---------|
| Structure [ML9] | <b>MFF-9</b>  | HH-9   | JTDIC-9 | <b>TCTPR-9</b> | JTCTPR-9 | CSAPR-9 |
|                 | <b>3.139,</b> | 8.701, | 10.396, | <b>2.699,</b>  | 4.195,   | 3.334,  |
| JCSAPR-9        | CCU-9         | JCCU-9 | JTC-9   | HBPY-9         | OPY-9    | EP-9    |
| 4.331,          | 4.782,        | 6.504, | 16.000, | 16.280,        | 21.730,  | 36.402  |

**2·2H<sub>2</sub>O**

|                 |               |        |         |         |          |                |
|-----------------|---------------|--------|---------|---------|----------|----------------|
| Structure [ML9] | <b>MFF-9</b>  | HH-9   | JTDIC-9 | TCTPR-9 | JTCTPR-9 | <b>CSAPR-9</b> |
|                 | <b>2.012,</b> | 8.895, | 10.756, | 2.863,  | 4.393,   | <b>1.909,</b>  |
| JCSAPR-9        | CCU-9         | JCCU-9 | JTC-9   | HBPY-9  | OPY-9    | EP-9           |
| 2.680,          | 5.410,        | 6.596, | 15.941, | 15.998, | 24.017,  | 36.365         |

### 3

#### 3a

|                  |         |         |               |         |         |          |        |
|------------------|---------|---------|---------------|---------|---------|----------|--------|
| Structure [ML8 ] | ETBPY-8 | TT-8    | <b>JSD-8</b>  | BTPR-8  | JBTPR-8 | JETBPY-8 | JGBF-8 |
|                  | 20.878, | 10.340, | <b>2.888,</b> | 3.649,  | 3.760,  | 23.682   | 9.730  |
| <b>TDD-8</b>     | SAPR-8  | CU-8    | HBPY-8        | HPY-8   | OP-8    |          |        |
| <b>2.836,</b>    | 4.306,  | 9.495,  | 12.407,       | 24.894, | 32.855  |          |        |

#### 3b

|                  |         |         |        |        |               |         |        |
|------------------|---------|---------|--------|--------|---------------|---------|--------|
| Structure [ML7 ] | JETPY-7 | JPBPY-7 | CTPR-7 | COC-7  | <b>PBPY-7</b> | HPY-7   | HP-7   |
|                  | 19.934, | 6.452,  | 5.941, | 8.093, | <b>1.345,</b> | 23.284, | 33.054 |

### 4

#### Y

|                  |               |        |         |                |          |         |
|------------------|---------------|--------|---------|----------------|----------|---------|
| Structure [ML9 ] | <b>MFF-9</b>  | HH-9   | JTDIC-9 | <b>TCTPR-9</b> | JTCTPR-9 | CSAPR-9 |
|                  | <b>2.734,</b> | 9.476, | 10.259, | <b>2.290,</b>  | 3.873,   | 2.954,  |
| JCSAPR-9         | CCU-9         | JCCU-9 | JTC-9   | HBPY-9         | OPY-9    | EP-9    |
| 3.832,           | 5.518,        | 7.256, | 15.793, | 16.574,        | 20.951,  | 36.788  |

#### Dy

|                  |               |        |         |                |          |         |
|------------------|---------------|--------|---------|----------------|----------|---------|
| Structure [ML9 ] | <b>MFF-9</b>  | HH-9   | JTDIC-9 | <b>TCTPR-9</b> | JTCTPR-9 | CSAPR-9 |
|                  | <b>2.715,</b> | 9.535, | 10.269, | <b>2.308,</b>  | 3.891,   | 2.973   |
| JCSAPR-9         | CCU-9         | JCCU-9 | JTC-9   | HBPY-9         | OPY-9    | EP-9    |
| 3.981,           | 5.535,        | 7.276, | 15.836, | 16.589,        | 20.967,  | 36.799  |



**Table S5.** Main bond distances (Å) and angles (°) for **3**.

| <b>3a</b>   |           | <b>3b</b>                 |            |
|-------------|-----------|---------------------------|------------|
| Dy1-O11     | 2.219(9)  | Dy2-O21                   | 2.286(9)   |
| Dy1-O12     | 2.408(10) | Dy2-Cl2                   | 2.615(3)   |
| Dy1-N11     | 2.452(11) | Dy2-N21                   | 2.506(10)  |
| Dy1-N12     | 2.488(10) | Dy2-N22                   | 2.480(15)  |
| O12-Dy1-N12 | 64.0(3)   | N22-Dy2-N21               | 64.9(3)    |
| O11-Dy1-O12 | 162.5(3)  | Cl2-Dy2-Cl2 <sup>#1</sup> | 176.74(16) |

#1: -x+1,y,-z+3/2

**Table S6.** Main bond distances (Å) and angles (°) for **4**

|            |            |             |           |
|------------|------------|-------------|-----------|
| Y1-O2      | 2.251(3)   | Dy1-O2      | 2.226(13) |
| Y1-O1      | 2.288(3)   | Dy1-O1      | 2.322(13) |
| Y1-O12     | 2.465(3)   | Dy1-O12     | 2.352(12) |
| Y1-O11     | 2.470(3)   | Dy1-O11     | 2.384(12) |
| Y1-O21     | 2.471(3)   | Dy1-O21     | 2.556(12) |
| Y1-O22     | 2.442(3)   | Dy1-O22     | 2.558(12) |
| Y1-N1      | 2.479(3)   | Dy1-N1      | 2.554(13) |
| Y1-N3      | 2.493(3)   | Dy1-N3      | 2.418(13) |
| Y1-N2      | 2.507(3)   | Dy1-N2      | 2.508(13) |
| O2-Y1-N1   | 158.24(13) | O1-Dy1-N3   | 161.2(6)  |
| O22-Y1-O21 | 52.12(7)   | O21-Dy1-O22 | 49.9(2)   |

**Table S7.** Metal complexes derived from H<sub>2</sub>L and related ligands crystallographically solved.

| Metal complex <sup>a</sup>                                                                                            | Charge/<br>Coordination mode <sup>b</sup>                       | Nuclearity   | Ref. in the article |
|-----------------------------------------------------------------------------------------------------------------------|-----------------------------------------------------------------|--------------|---------------------|
| [Cd <sub>3</sub> L(OAc) <sub>2</sub> (dmf) <sub>2</sub> ]                                                             | dianionic/ N <sub>3</sub> O <sub>2</sub> μ <sub>2</sub> -bridge | trinuclear   | 14                  |
| [ReL(PPh <sub>3</sub> ) <sub>2</sub> ]I                                                                               | dianionic/ N <sub>3</sub> O <sub>2</sub> chelate                | mononuclear  | 15                  |
| fac-[Re(CO) <sub>3</sub> H <sub>2</sub> L(Br)]                                                                        | neutral/ N <sub>2</sub> chelate                                 | mononuclear  | 15                  |
| fac-[Re(CO) <sub>3</sub> H <sub>2</sub> L(Cl)]                                                                        | neutral/ N <sub>2</sub> chelate                                 | mononuclear  | 16                  |
| [SnL(Bu <sup>n</sup> ) <sub>2</sub> ]                                                                                 | dianionic/ N <sub>3</sub> O <sub>2</sub> chelate                | mononuclear  | 13                  |
| [SnL(Ph) <sub>2</sub> ]                                                                                               | dianionic/ N <sub>3</sub> O <sub>2</sub> chelate                | mononuclear  | 13                  |
| [Mn(H <sub>2</sub> L)Cl <sub>2</sub> ]                                                                                | neutral/ N <sub>3</sub> O <sub>2</sub> chelate                  | mononuclear  | 17                  |
| [Mn <sub>2</sub> Ca(L) <sub>2</sub> (OAc) <sub>2</sub> (MeOH) <sub>2</sub> ]                                          | dianionic/ N <sub>3</sub> O <sub>2</sub> μ <sub>2</sub> -bridge | trinuclear   | 17                  |
| [Mn <sub>3</sub> (L) <sub>2</sub> (OAc) <sub>2</sub> (MeOH) <sub>2</sub> ]                                            | dianionic/ N <sub>3</sub> O <sub>2</sub> μ <sub>2</sub> -bridge | trinuclear   | 17                  |
| [Zn <sub>2</sub> (L)(OAc) <sub>2</sub> (DMF)]                                                                         | dianionic/ N <sub>3</sub> O <sub>2</sub> μ <sub>2</sub> -bridge | dinuclear    | 18                  |
| [Zn <sub>4</sub> (5-Bu <sup>t</sup> L) <sub>2</sub> (OAc) <sub>4</sub> ]                                              | dianionic/ N <sub>3</sub> O <sub>2</sub> μ <sub>4</sub> -bridge | tetranuclear | 18                  |
| [Zn(3-MeH <sub>2</sub> L)(Cl) <sub>2</sub> ]                                                                          | neutral/ N <sub>2</sub> O chelate                               | mononuclear  | 19                  |
| [Zn <sub>2</sub> (5-MeL)(Cl) <sub>2</sub> (MeOH) <sub>2</sub> ]                                                       | dianionic/ N <sub>3</sub> O <sub>2</sub> μ <sub>2</sub> -bridge | dinuclear    | 19                  |
| [Mn(5-MeHL)(Cl)(MeOH)]                                                                                                | monoanionic/ N <sub>3</sub> O <sub>2</sub> chelate              | mononuclear  | 20                  |
| [Sn(5-MeL)(Bu <sup>n</sup> ) <sub>2</sub> ]                                                                           | dianionic/ N <sub>3</sub> O <sub>2</sub> chelate                | mononuclear  | 13                  |
| [Mn(H <sub>2</sub> L <sup>1</sup> )(NCS) <sub>2</sub> ]                                                               | neutral/ N <sub>3</sub> O <sub>2</sub> chelate                  | mononuclear  | 20                  |
| [Cd <sub>4</sub> (L <sup>Me</sup> ) <sub>2</sub> (OAc) <sub>4</sub> ]                                                 | dianionic/ N <sub>3</sub> O <sub>2</sub> μ <sub>4</sub> -bridge | tetranuclear | 14,18               |
| [Sn(L <sup>Me</sup> )(Bu <sup>n</sup> ) <sub>2</sub> ]                                                                | dianionic/ N <sub>3</sub> O <sub>2</sub> chelate                | mononuclear  | 13                  |
| [Sn(L <sup>Me</sup> )(Me) <sub>2</sub> ]                                                                              | dianionic/ N <sub>3</sub> O <sub>2</sub> chelate                | mononuclear  | 13                  |
| [Mn <sub>4</sub> (L <sup>Me</sup> ) <sub>2</sub> (OAc) <sub>4</sub> ]                                                 | dianionic/ N <sub>3</sub> O <sub>2</sub> μ <sub>4</sub> -bridge | tetranuclear | 21                  |
| [Mn <sub>4</sub> (L <sup>Me</sup> ) <sub>2</sub> (CF <sub>3</sub> COO) <sub>4</sub> ]                                 | dianionic/ N <sub>3</sub> O <sub>2</sub> μ <sub>4</sub> -bridge | tetranuclear | 21                  |
| [Zn <sub>4</sub> (L <sup>Me</sup> ) <sub>2</sub> (OAc) <sub>4</sub> ]                                                 | dianionic/ N <sub>3</sub> O <sub>2</sub> μ <sub>4</sub> -bridge | tetranuclear | 18                  |
| [Zn <sub>4</sub> (L <sup>Me</sup> ) <sub>2</sub> (OAc)(O <sub>2</sub> CC <sub>6</sub> H <sub>5</sub> ) <sub>3</sub> ] | dianionic/ N <sub>3</sub> O <sub>2</sub> μ <sub>4</sub> -bridge | tetranuclear | 18                  |
| [Zn <sub>4</sub> (5-ClL <sup>Me</sup> ) <sub>2</sub> (OAc) <sub>4</sub> ]                                             | dianionic/ N <sub>3</sub> O <sub>2</sub> μ <sub>4</sub> -bridge | tetranuclear | 18                  |

<sup>a</sup> Complexes without solvates; ligands in Scheme S2 (except H<sub>2</sub>L, Scheme 1); <sup>b</sup> coordination mode in Scheme S3

**Table S8.** Generalised Debye model fitting parameters for **2·2H<sub>2</sub>O-4**

| Compounds                       | T/K   | $\chi_S/(\text{cm}^3 \text{mol}^{-1})$ | $\chi_T/(\text{cm}^3 \text{mol}^{-1})$ | $\tau/(10^{-4}\text{s})$ | $\alpha$ |
|---------------------------------|-------|----------------------------------------|----------------------------------------|--------------------------|----------|
| 2·2H <sub>2</sub> O             | 4.00  | 2.01                                   | 2.92                                   | 10.64                    | 0.18     |
|                                 | 4.25  | 1.91                                   | 2.79                                   | 7.05                     | 0.17     |
|                                 | 4.50  | 1.85                                   | 2.67                                   | 5.36                     | 0.12     |
|                                 | 4.75  | 1.72                                   | 2.59                                   | 4.01                     | 0.19     |
|                                 | 5.00  | 1.72                                   | 2.46                                   | 2.97                     | 0.08     |
|                                 | 5.25  | 1.66                                   | 2.37                                   | 2.35                     | 0.07     |
|                                 | 5.50  | 1.47                                   | 2.07                                   | 1.80                     | 0.08     |
|                                 | 5.75  | 1.55                                   | 2.21                                   | 1.31                     | 0.06     |
|                                 | 6.0   | 1.49                                   | 2.13                                   | 0.95                     | 0.08     |
| 3                               | 3.5   | 1.39                                   | 4.70                                   | 5.01                     | 0.39     |
|                                 | 4.0   | 1.45                                   | 4.48                                   | 5.01                     | 0.36     |
|                                 | 4.5   | 1.51                                   | 4.21                                   | 4.88                     | 0.31     |
|                                 | 5.0   | 1.51                                   | 3.95                                   | 4.54                     | 0.28     |
|                                 | 5.5   | 1.50                                   | 3.69                                   | 4.09                     | 0.24     |
|                                 | 6.0   | 1.47                                   | 3.46                                   | 3.52                     | 0.22     |
|                                 | 6.5   | 1.42                                   | 3.25                                   | 3.00                     | 0.21     |
|                                 | 7.0   | 1.40                                   | 3.07                                   | 2.57                     | 0.19     |
|                                 | 7.5   | 1.36                                   | 2.90                                   | 2.11                     | 0.18     |
|                                 | 8.0   | 1.30                                   | 2.75                                   | 1.78                     | 0.18     |
|                                 | 8.5   | 1.30                                   | 2.61                                   | 1.44                     | 0.17     |
|                                 | 9.0   | 1.26                                   | 2.48                                   | 1.25                     | 0.17     |
|                                 | 9.5   | 1.25                                   | 2.37                                   | 1.04                     | 0.16     |
| 10                              | 1.24  | 2.27                                   | 0.89                                   | 0.16                     |          |
| 4<br>(H <sub>dc</sub> =0 Oe)    | 3.75  | 0.13                                   | 0.30                                   | 1.79                     | 0.40     |
|                                 | 4.00  | 0.13                                   | 0.28                                   | 1.85                     | 0.35     |
|                                 | 4.25  | 0.14                                   | 0.27                                   | 1.84                     | 0.27     |
|                                 | 4.50  | 0.13                                   | 0.25                                   | 1.78                     | 0.23     |
|                                 | 4.75  | 0.12                                   | 0.24                                   | 1.57                     | 0.20     |
|                                 | 5.00  | 0.12                                   | 0.23                                   | 1.40                     | 0.14     |
|                                 | 5.25  | 0.12                                   | 0.22                                   | 1.28                     | 0.10     |
|                                 | 5.50  | 0.11                                   | 0.21                                   | 1.11                     | 0.09     |
|                                 | 5.75  | 0.094                                  | 0.20                                   | 0.95                     | 0.11     |
| 6.00                            | 0.084 | 0.19                                   | 0.79                                   | 0.12                     |          |
| 4<br>(H <sub>dc</sub> =1500 Oe) | 2.8   | 0.11                                   | 0.41                                   | 595                      | 0.18     |
|                                 | 3.0   | 0.11                                   | 0.37                                   | 358                      | 0.13     |
|                                 | 3.2   | 0.10                                   | 0.35                                   | 223                      | 0.08     |
|                                 | 3.4   | 0.094                                  | 0.33                                   | 138                      | 0.09     |
|                                 | 3.6   | 0.087                                  | 0.31                                   | 87.5                     | 0.09     |
|                                 | 3.8   | 0.082                                  | 0.29                                   | 55.3                     | 0.09     |
|                                 | 4.0   | 0.074                                  | 0.28                                   | 35.5                     | 0.10     |
|                                 | 4.2   | 0.076                                  | 0.27                                   | 23.9                     | 0.06     |
|                                 | 4.4   | 0.068                                  | 0.26                                   | 16.2                     | 0.08     |
|                                 | 4.6   | 0.066                                  | 0.25                                   | 11.4                     | 0.09     |
|                                 | 4.8   | 0.065                                  | 0.24                                   | 7.91                     | 0.07     |
|                                 | 5.    | 0.062                                  | 0.23                                   | 5.76                     | 0.08     |
|                                 | 5.2   | 0.056                                  | 0.22                                   | 4.10                     | 0.09     |
|                                 | 5.4   | 0.052                                  | 0.21                                   | 3.05                     | 0.11     |
|                                 | 5.6   | 0.047                                  | 0.20                                   | 2.23                     | 0.11     |
| 5.8                             | 0.039 | 0.20                                   | 1.79                                   | 0.14                     |          |
